# Supplementary material for: Rule-based spatial modeling with diffusing, geometrically constrained molecules
Source: Springer Nature journal article supplement (doi:10.1186/1471-2105-11-307), 2010-06-07

a) monomer with two sites

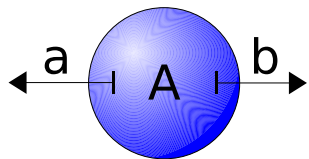

b) reaction rule for polymerization:

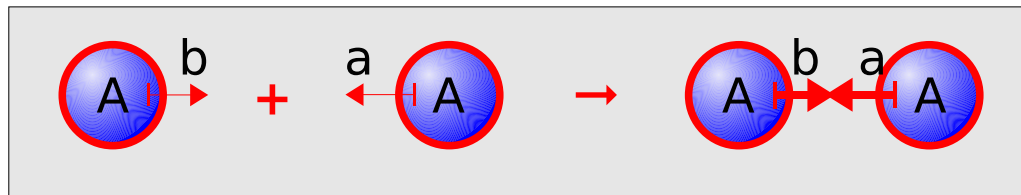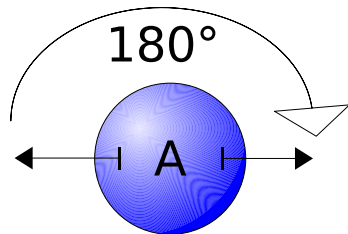

c) linear arrangement of the binding sites

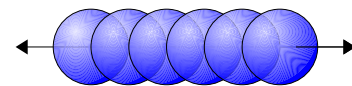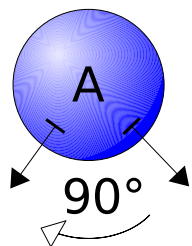

d) rectangular arrangement of the binding sites

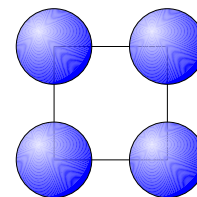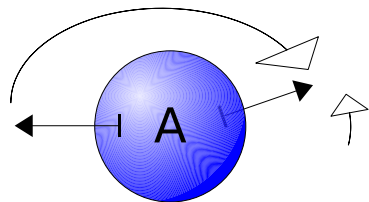

e) less than 180°, slight inclination out of the plane

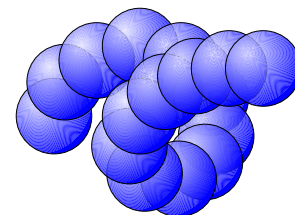

Supplement: 12859_2009_3764_MOESM6_ESM.pdf [file 12859_2009_3764_MOESM6_ESM.pdf]
