# Supplementary material for: Rule-based spatial modeling with diffusing, geometrically constrained molecules
Source: Springer Nature journal article supplement (doi:10.1186/1471-2105-11-307), 2010-06-07

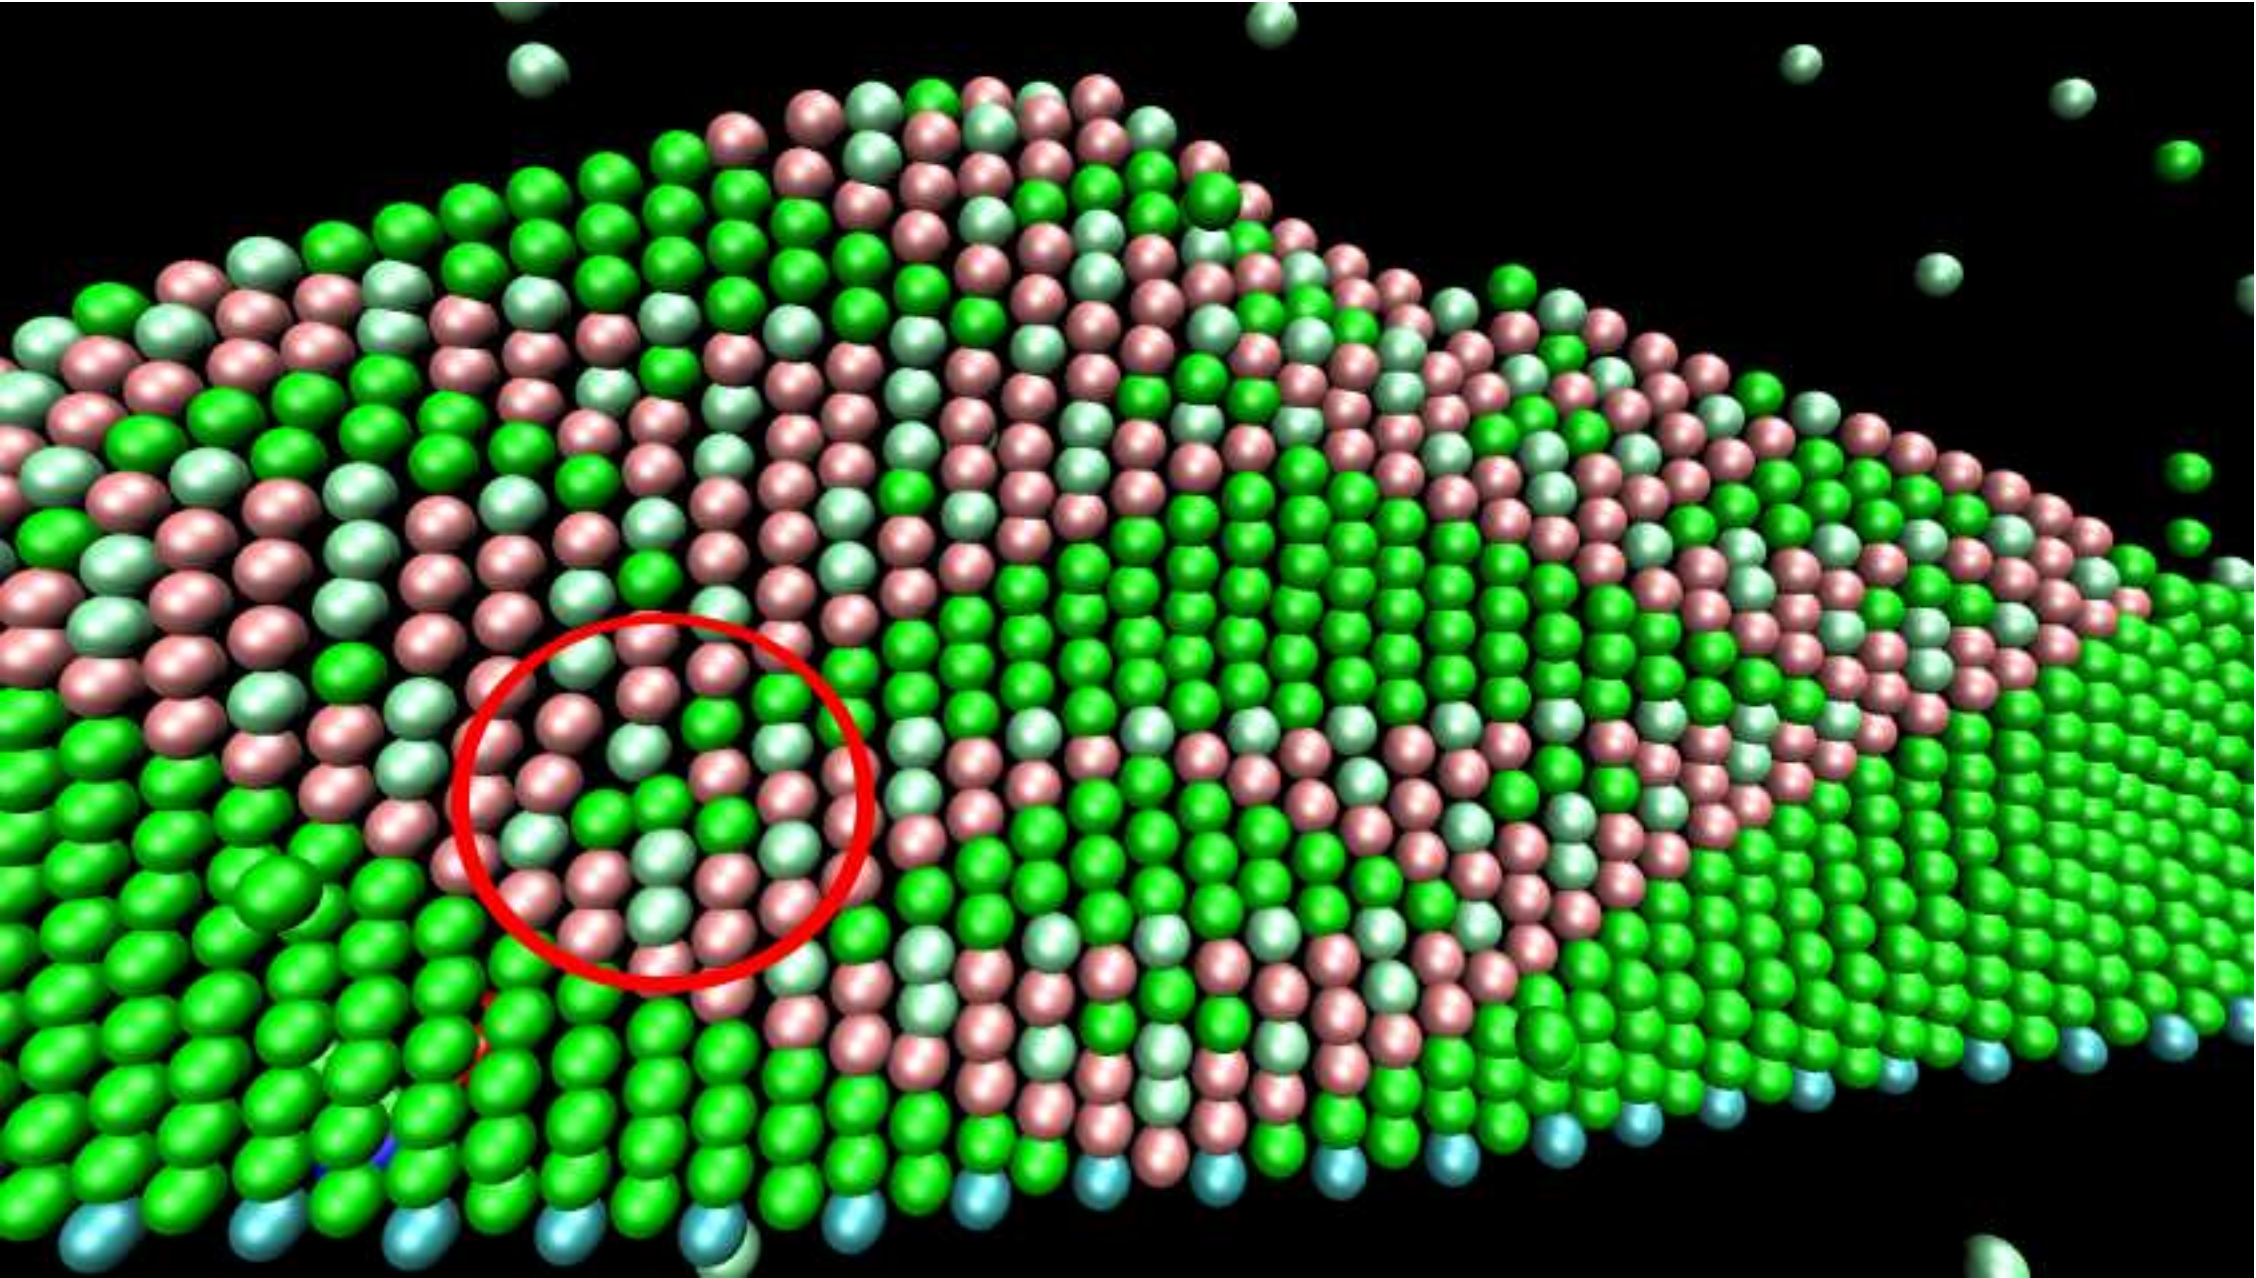

Supplement: 12859_2009_3764_MOESM12_ESM.pdf [file 12859_2009_3764_MOESM12_ESM.pdf]
