# Supplementary material for: Rule-based spatial modeling with diffusing, geometrically constrained molecules
Source: Springer Nature journal article supplement (doi:10.1186/1471-2105-11-307), 2010-06-07

a) tile naming convention

$$X \text{ xor } Y = Z$$

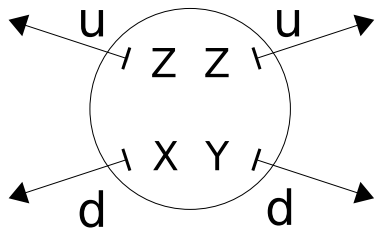

'Z' tiles

b) '0' and '1' tiles

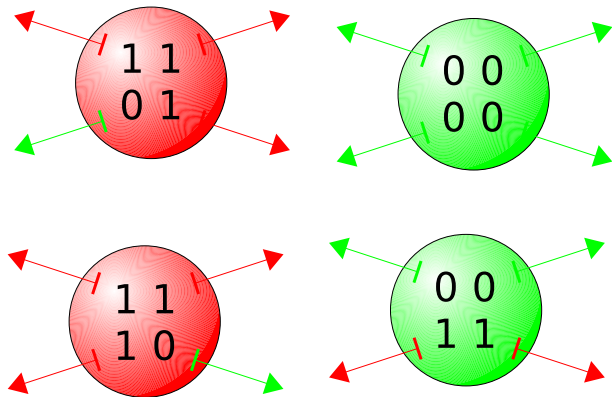

'1' tiles

'0' tiles

c) assembly reaction

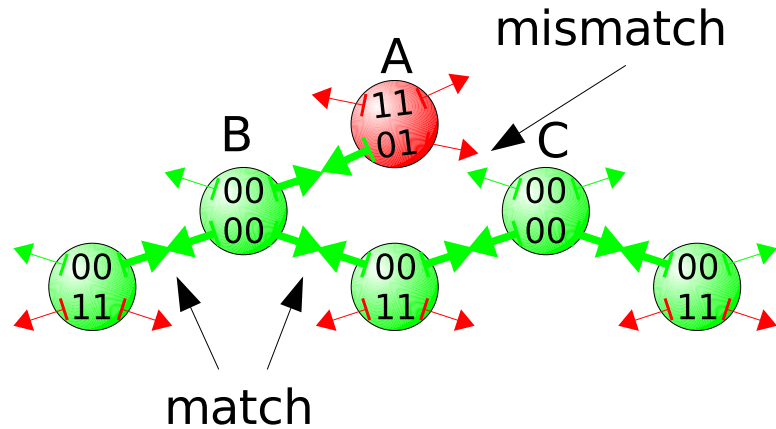

Supplement: 12859_2009_3764_MOESM13_ESM.pdf [file 12859_2009_3764_MOESM13_ESM.pdf]
